# Supplementary material
Source: publisher site journal article supplement (https://www.dovepress.com/article/223690)
Supplement: Supplementary file 1 [file get_supplementary_file.php]

**Supplementary Tables**

| **Supplementary Table S1**. The associations * between glucose metabolism and vascular aging after further adjusting physical activity and sleep quality | | | | | | | | |
| --- | --- | --- | --- | --- | --- | --- | --- | --- |
| Glucose metabolism | PP≥54 mmHg | |  | cfPWV≥8.84 m/s | |  | PP≥54 mmHg and/or cfPWV≥8.84 m/s | |
| OR (95%CI) | *P*-value |  | OR (95%CI) | *P*-value |  | OR (95%CI) | *P*-value |
| Fasting glucose | 1.06 (1.00-1.12) | 0.051 |  | 1.06 (1.01-1.10) | 0.015 |  | 1.08 (1.03-1.13) | 0.002 |
| HbA1c | 1.12 (1.02-1.23) | 0.014 |  | 1.10 (1.03-1.18) | 0.007 |  | 1.13 (1.05-1.21) | 0.001 |
| *Adjust for age, sex, education level, cigarette smoking, alcohol consumption, body mass index, low- and high-density lipoprotein cholesterol, systolic blood pressure, physical activity, sedentary behavior, and sleep quality.  PP: pulse pressure; cfPWV: carotid-femoral pulse wave velocity. | | | | | | | | |

| **Supplementary Table S2**. The associations * of glucose metabolism with PP and cfPWV after excluding participants with prevalent hypertension, diabetes, and cardiovascular disease | | | | | | |
| --- | --- | --- | --- | --- | --- | --- |
| Variable |  | PP≥54 mmHg | |  | cfPWV≥8.84 m/s | |
|  | b (95%CI) | *P*-value |  | b (95%CI) | *P*-value |
| Excluding hypertension participants | | | | | | |
| Fasting glucose |  | 0.12 (-0.08-0.31) | 0.230 |  | 0.12 (0.05-0.18) | <0.001 |
| HbA1c |  | 0.42 (0.11-0.74) | 0.009 |  | 0.19 (0.09-0.29) | <0.001 |
| Excluding diabetes participants | | | | | | |
| Fasting glucose |  | 0.20 (-0.09-0.50) | 0.179 |  | 0.15 (0.08-0.22) | <0.001 |
| HbA1c |  | 0.52 (0.07-0.97) | 0.024 |  | 0.14 (0.04-0.23) | 0.005 |
| Excluding CVD participants | | | | | | |
| Fasting glucose |  | 0.20 (0.01-0.38) | 0.038 |  | 0.14 (0.08-0.21) | <0.001 |
| HbA1c |  | 0.50 (0.29-0.72) | <0.001 |  | 0.20 (0.12-0.28) | <0.001 |
| *Adjust for age, sex, education level, cigarette smoking, alcohol consumption, body mass index, low- and high-density lipoprotein cholesterol and systolic blood pressure.  PP: pulse pressure; cfPWV: carotid-femoral pulse wave velocity; CVD: cardiovascular disease. | | | | | | |

| **Supplementary Table S3**. The associations * between glucose metabolism and vascular aging after excluding participants with prevalent hypertension, diabetes, and cardiovascular disease | | | | | | | | |
| --- | --- | --- | --- | --- | --- | --- | --- | --- |
| Variable | PP≥54 mmHg | |  | cfPWV≥8.84 m/s | |  | PP≥54 mmHg and/or cfPWV≥8.84 m/s | |
| OR (95%CI) | *P*-value |  | OR (95%CI) | *P*-value |  | OR (95%CI) | *P*-value |
| Excluding hypertension participants | | | | | | | | |
| Fasting glucose | 1.02 (0.95-1.11) | 0.567 |  | 1.06 (1.00-1.12) | 0.046 |  | 1.07 (1.01-1.14) | 0.022 |
| HbA1c | 1.05 (0.92-1.20) | 0.415 |  | 1.13 (1.03-1.23) | 0.012 |  | 1.13 (1.02-1.24) | 0.014 |
| Excluding diabetes participants | | | | | | | | |
| Fasting glucose | 1.09 (1.01-1.19) | 0.037 |  | 1.06 (0.99-1.13) | 0.099 |  | 1.11 (1.03-1.20) | 0.004 |
| HbA1c | 1.13 (0.98-1.30) | 0.083 |  | 1.09 (0.98-1.21) | 0.130 |  | 1.12 (1.00-1.25) | 0.045 |
| Excluding CVD participants | | | | | | | | |
| Fasting glucose | 1.06 (1.00-1.12) | 0.073 |  | 1.06 (1.01-1.11) | 0.016 |  | 1.08 (1.03-1.13) | 0.002 |
| HbA1c | 1.09 (1.00-1.20) | 0.064 |  | 1.10 (1.03-1.19) | 0.008 |  | 1.11 (1.03-1.20) | 0.006 |
| *Adjust for age, sex, education level, cigarette smoking, alcohol consumption, body mass index, low- and high-density lipoprotein cholesterol and systolic blood pressure.  PP: pulse pressure; cfPWV: carotid-femoral pulse wave velocity; CVD: cardiovascular disease. | | | | | | | | |
